# Supplementary material
Source: publisher figshare collection journal article supplement (https://springernature.figshare.com/ndownloader/files/22906343)
Supplement: Supplementary file [file 22906343]

## Additional file 2

Tabel 1. Indices used to evaluate dental health in Swedish commercial pigs.

| Index                   |  | Scale | Scale and description                                                                          |
|-------------------------|--|-------|------------------------------------------------------------------------------------------------|
| Calculus index (CI)     |  | CI0   | No calculi present                                                                             |
|                         |  | CI1   | Calculi covering <50 % of the tooth crown                                                      |
|                         |  | CI2   | Calculi covering >50 % but not 100 % of the tooth crown                                        |
|                         |  | CI3   | Calculi covering 100 % of the tooth crown                                                      |
| Tooth wear (TW)         |  | TW0   | No wear                                                                                        |
|                         |  | TW1   | Blunting of tooth profile                                                                      |
|                         |  | TW2   | Appearance of reparative dentine                                                               |
|                         |  | TW3   | Tooth worn to the margin of the gingiva                                                        |
| Mobility (M)            |  | M1    | Barely detectable movement                                                                     |
|                         |  | M2    | Tooth is moving but stays in the alveolus                                                      |
|                         |  | M3    | Very loose tooth that can fall out if touched                                                  |
| Periodontal index (PDI) |  | PDI1  | Gingival recession exposing 20-50 % of root(s)                                                 |
|                         |  | PDI2  | Gingival recession exposing 50-70 % of root(s), M2, hyperplasia or pus, imminent loss of tooth |
|                         |  | PDI3  | Gingival recession exposing >70 % of root(s), M3, appearance of pus and spontaneous tooth loss |
